# Supplementary material for: Elongating Effect of the Peptide AEDL on the Root of Nicotiana tabacum under Salinity
Source: MDPI journal article supplement (doi:10.3390/plants11101352), 2022-05-19
Supplement: s1 [file s1]

Table S1. Condensed and decondensed chromatin content in the nuclei of tobacco root cells

| Treatment          | Condensed chromatin, % | Decondensed chromatin, % |
|--------------------|------------------------|--------------------------|
| Control            | 42,3±1,2               | 57,7±1,3                 |
| +AEDL              | 69,6±2,0               | 30,4±1,1                 |
| +150 mM NaCl       | 64,3±2,8               | 35,7±1,8                 |
| +AEDL+ 150 mM NaCl | 30,2±1,6               | 69,8±2,3                 |

Table S2. Primers for RT-PCR

| gene         | 5'-3'-sequence                                                |
|--------------|---------------------------------------------------------------|
| <i>EXPA3</i> | TGT CCA AAG TTG GTG TAA CAG GA<br>TGA AGA TTG CAG CTG AGG CA  |
| <i>EXPA5</i> | GGC TTT ATT GCT GTG GTG GC<br>AAG TCG CCC CAA TTC TGC TT      |
| <i>WOX1</i>  | CAC CCA TTT TAG TTA TTC TCC CCC<br>TGT TGA AAT CTC CCC CGT CG |
| <i>WOX5</i>  | TCA AGG GTC CGAACA ACC AG<br>CAA ACT TTC AGC CCC ACC TG       |
| <i>WOX7</i>  | TGT TCA GGT CAG GAC TCC GT<br>ACT CTG CGA CGT TTC TGT CT      |
| <i>WOX11</i> | TTG CCA AAT TCC TTG TCT TCA GC<br>CCC GTC GTT GTA ACC CAT CA  |
